# Supplementary material for: Pathobiont-mediated spatial structuring enhances biofilm virulence in childhood oral disease
Source: Research Square preprint supplement (doi:10.21203/rs.3.rs-1748651/v1), 2022-06-17
Supplement: Supplementary file 1 [file 5b1425955068cc116f107421.pdf]

Corresponding author(s): Kimon Divaris, Di Wu, Hyun Koo

Last updated by author(s): Jun 11, 2022

## Reporting Summary

Nature Portfolio wishes to improve the reproducibility of the work that we publish. This form provides structure for consistency and transparency in reporting. For further information on Nature Portfolio policies, see our [Editorial Policies](#) and the [Editorial Policy Checklist](#).

### Statistics

For all statistical analyses, confirm that the following items are present in the figure legend, table legend, main text, or Methods section.

- |                                     |                                                                                                                                                                                                                                                                                                |
|-------------------------------------|------------------------------------------------------------------------------------------------------------------------------------------------------------------------------------------------------------------------------------------------------------------------------------------------|
| n/a                                 | Confirmed                                                                                                                                                                                                                                                                                      |
| <input type="checkbox"/>            | <input checked="" type="checkbox"/> The exact sample size ( $n$ ) for each experimental group/condition, given as a discrete number and unit of measurement                                                                                                                                    |
| <input type="checkbox"/>            | <input checked="" type="checkbox"/> A statement on whether measurements were taken from distinct samples or whether the same sample was measured repeatedly                                                                                                                                    |
| <input type="checkbox"/>            | <input checked="" type="checkbox"/> The statistical test(s) used AND whether they are one- or two-sided<br><i>Only common tests should be described solely by name; describe more complex techniques in the Methods section.</i>                                                               |
| <input type="checkbox"/>            | <input checked="" type="checkbox"/> A description of all covariates tested                                                                                                                                                                                                                     |
| <input type="checkbox"/>            | <input checked="" type="checkbox"/> A description of any assumptions or corrections, such as tests of normality and adjustment for multiple comparisons                                                                                                                                        |
| <input type="checkbox"/>            | <input checked="" type="checkbox"/> A full description of the statistical parameters including central tendency (e.g. means) or other basic estimates (e.g. regression coefficient) AND variation (e.g. standard deviation) or associated estimates of uncertainty (e.g. confidence intervals) |
| <input type="checkbox"/>            | <input checked="" type="checkbox"/> For null hypothesis testing, the test statistic (e.g. $F$ , $t$ , $r$ ) with confidence intervals, effect sizes, degrees of freedom and $P$ value noted<br><i>Give <math>P</math> values as exact values whenever suitable.</i>                            |
| <input checked="" type="checkbox"/> | <input type="checkbox"/> For Bayesian analysis, information on the choice of priors and Markov chain Monte Carlo settings                                                                                                                                                                      |
| <input checked="" type="checkbox"/> | <input type="checkbox"/> For hierarchical and complex designs, identification of the appropriate level for tests and full reporting of outcomes                                                                                                                                                |
| <input type="checkbox"/>            | <input checked="" type="checkbox"/> Estimates of effect sizes (e.g. Cohen's $d$ , Pearson's $r$ ), indicating how they were calculated                                                                                                                                                         |

Our web collection on [statistics for biologists](#) contains articles on many of the points above.

### Software and code

Policy information about [availability of computer code](#)

#### Data collection

Illumina sequencing data were demultiplexed using Illumina Bcl2Fastq 2.20.0 (Illumina, Inc. San Diego, CA, USA.). Quality control of the demultiplexed sequencing reads was verified by FastQC (Babraham Institute. Cambridge, UK). Adapters were trimmed using Trim Galore (Babraham Institute. Cambridge, UK). Paired-end reads were joined with vsearch 1.10.2. Estimates of taxonomic composition, gene family, path abundance, and path coverage were produced from the remaining reads using Kracken2/Bracken and a custom database including human, fungal, bacterial, and the expanded Human Oral Microbiome Database (eHOMD) genomes. For targeted MTX analyses, reads were aligned to the relevant reference transcriptome of the top 4 species using STAR and subsequently quantified via Salmon. Metabolic activity was measured using calView™ software (Version 1.0.33.0, © 2015 SymCel, Sverige AB). Fluorescent signals were subtracted from each other for biofilm imaging using applied channel subtraction using the Image Calculator in ImageJ Fiji (<https://imagej.net/Fiji>). Computational image processing and quantitative analysis were performed using BiofilmQ software (<https://drescherlab.org/data/biofilmQ>). To track single-cell bacterial motility in real time, we performed computational single-particle tracking and generated time-resolved trajectories using the TrackMate plugin in ImageJ Fiji. Biofilm visualization was performed using maximum intensity projection and 3D surface rendering in ImageJ Fiji.

#### Data analysis

R code was used for all analyses. The code has been made available at this location: [https://github.com/Hunyong/ZOE\\_metagenomics\\_2022](https://github.com/Hunyong/ZOE_metagenomics_2022)

For manuscripts utilizing custom algorithms or software that are central to the research but not yet described in published literature, software must be made available to editors and reviewers. We strongly encourage code deposition in a community repository (e.g. GitHub). See the Nature Portfolio [guidelines for submitting code & software](#) for further information.

## Data

Policy information about [availability of data](#)

All manuscripts must include a [data availability statement](#). This statement should provide the following information, where applicable:

- Accession codes, unique identifiers, or web links for publicly available datasets
- A description of any restrictions on data availability
- For clinical datasets or third party data, please ensure that the statement adheres to our [policy](#)

Microbiome taxonomy (MTG and MTX), pathway, and targeted MTX data for the four top species used in this study have been deposited and are freely accessible alongside metadata (i.e., demographic and clinical phenotype information) used in ZOE 2.0 and ZOE pilot via the Carolina Digital Repository: [https://cdr.lib.unc.edu/concern/data\\_sets/5d86p890x](https://cdr.lib.unc.edu/concern/data_sets/5d86p890x) These data directly correspond to the R code that has been made available.

## Field-specific reporting

Please select the one below that is the best fit for your research. If you are not sure, read the appropriate sections before making your selection.

☒ Life sciences ☐ Behavioural & social sciences ☐ Ecological, evolutionary & environmental sciences

For a reference copy of the document with all sections, see [nature.com/documents/nr-reporting-summary-flat.pdf](https://nature.com/documents/nr-reporting-summary-flat.pdf)

## Life sciences study design

All studies must disclose on these points even when the disclosure is negative.

|                 |                                                                                                                                                                                                                                                                                                                                                                                                                                                                                                                                                                                                                                                                                                                                                                                                                                                                                                                                                                         |
|-----------------|-------------------------------------------------------------------------------------------------------------------------------------------------------------------------------------------------------------------------------------------------------------------------------------------------------------------------------------------------------------------------------------------------------------------------------------------------------------------------------------------------------------------------------------------------------------------------------------------------------------------------------------------------------------------------------------------------------------------------------------------------------------------------------------------------------------------------------------------------------------------------------------------------------------------------------------------------------------------------|
| Sample size     | The sample size for taxonomic discovery was determined based on a convenience sample representing ~5% of the parent cohort study (n=300 out of ~6,400 participants) and was selected as a case-control sample of caries cases: control among the first enrolled/examined participants. This sample was multiple times larger than previous studies reporting taxonomic discovery employing WGS shotgun and/or RNAseq in dental caries--e.g., PMID: 33239396 included 47 participants, PMID: 30671194 included 30 participants, and PMID: 32423437 included 20 participants. The replication sample of 116 participants was fixed and was not based on a calculation but rather availability of funds to generate MTG and MTX data to determine feasibility and fidelity of the experimental approach.                                                                                                                                                                   |
| Data exclusions | MTX data were not available for 3 participants in the ZOE 2.0 study (discovery sample) leaving an analytical sample of 297 for that analysis; meanwhile, MTG and MTX data were not available for 2 ZOE pilot (replication sample) participants, leaving analytical samples of 116 for these analyses.                                                                                                                                                                                                                                                                                                                                                                                                                                                                                                                                                                                                                                                                   |
| Replication     | Replication of the identified associations of taxonomic abundance in supragingival biofilm microbiome data were sought across 8 different analyses. These involved MTG and MTX data, localized and person-level caries experience traits, as well as a discovery and a replication sample. As evidence of replication, we considered, in order of ascending importance, directional consistency of the estimate of association, nominal significance, or FDR-level significance in the replication sample. Species that were FDR-significant in all 4 models in the discovery sample and were at least nominally significant for localized disease experience in MTG data were termed "significant species". This set of species with high-confidence evidence of association from multiple traits, MTG and MTX data, and from all 416 study participants were prioritized for reporting and were candidates for consideration in the experimental validation pipeline. |
| Randomization   | There were no human experimental group or intervention allocation in this study. Randomization of animals was undertaken at the experimental aspect of the study.                                                                                                                                                                                                                                                                                                                                                                                                                                                                                                                                                                                                                                                                                                                                                                                                       |
| Blinding        | Blinding is not relevant to this observational study because all participants underwent clinical dental examinations prior to the conduct of microbiome analyses and the latter could not have possibly influenced clinical examination findings. For the animal experimental study, investigators were masked to experimental group (i.e., infection) allocations during the infection, sampling, and assessment stages, by using color-coded samples.                                                                                                                                                                                                                                                                                                                                                                                                                                                                                                                 |

## Reporting for specific materials, systems and methods

We require information from authors about some types of materials, experimental systems and methods used in many studies. Here, indicate whether each material, system or method listed is relevant to your study. If you are not sure if a list item applies to your research, read the appropriate section before selecting a response.

## Materials & experimental systems

|                                     |                                                                 |
|-------------------------------------|-----------------------------------------------------------------|
| n/a                                 | Involved in the study                                           |
| <input checked="" type="checkbox"/> | <input type="checkbox"/> Antibodies                             |
| <input checked="" type="checkbox"/> | <input type="checkbox"/> Eukaryotic cell lines                  |
| <input checked="" type="checkbox"/> | <input type="checkbox"/> Palaeontology and archaeology          |
| <input type="checkbox"/>            | <input checked="" type="checkbox"/> Animals and other organisms |
| <input type="checkbox"/>            | <input checked="" type="checkbox"/> Human research participants |
| <input type="checkbox"/>            | <input checked="" type="checkbox"/> Clinical data               |
| <input checked="" type="checkbox"/> | <input type="checkbox"/> Dual use research of concern           |

## Methods

|                                     |                                                 |
|-------------------------------------|-------------------------------------------------|
| n/a                                 | Involved in the study                           |
| <input checked="" type="checkbox"/> | <input type="checkbox"/> ChIP-seq               |
| <input checked="" type="checkbox"/> | <input type="checkbox"/> Flow cytometry         |
| <input checked="" type="checkbox"/> | <input type="checkbox"/> MRI-based neuroimaging |

## Animals and other organisms

Policy information about [studies involving animals](#); [ARRIVE guidelines](#) recommended for reporting animal research

|                         |                                                                                                                                                                                                                                                                                                                                                                                                                                                                                                                                                                                                                           |
|-------------------------|---------------------------------------------------------------------------------------------------------------------------------------------------------------------------------------------------------------------------------------------------------------------------------------------------------------------------------------------------------------------------------------------------------------------------------------------------------------------------------------------------------------------------------------------------------------------------------------------------------------------------|
| Laboratory animals      | Laboratory animals were 15 day-old female Sprague-Dawley rat pups, specific-pathogen-free grade, that were purchased with dams (8 pups per dam) from Harlan Laboratories (Indianapolis, IN, USA)                                                                                                                                                                                                                                                                                                                                                                                                                          |
| Wild animals            | There were no wild animals involved in this study.                                                                                                                                                                                                                                                                                                                                                                                                                                                                                                                                                                        |
| Field-collected samples | Supragingival plaque biofilm samples for MTG and MTX were collected using sterile tooth picks from the facial/buccal surfaces of the upper-right 5 primary teeth. Samples were immediately stored in RNAlater TissueProtect 1.5ml tubes and frozen on premise using coolboxes and portable -20 freezers. Subsequently samples were transferred to the UNC biospecimen core processing facility and were stored in -80 until nucleic acid extraction, and processing. Further details are provided in the study's supragingival biofilm collection and processing protocol reported by Divaris et al. 2019 PMID: 30838598. |
| Ethics oversight        | Human observational data and analyses received approval (#14-1992) from the University of North Carolina-Chapel Hill Office of Human Research Ethics Institutional Review Board on September 18, 2014. Legal guardians of all children provided written informed consent for participation in the study. The in vivo experimental study was reviewed and approved by the Institutional Animal Care and Use Committee of the University of Pennsylvania (IACUC#805735).                                                                                                                                                    |

Note that full information on the approval of the study protocol must also be provided in the manuscript.

## Human research participants

Policy information about [studies involving human research participants](#)

|                            |                                                                                                                                                                                                                                                                                                                                                                                                                                                                                                                                                                                                                                                                                                                                                                                                                                                                                                                                                                                                                                               |
|----------------------------|-----------------------------------------------------------------------------------------------------------------------------------------------------------------------------------------------------------------------------------------------------------------------------------------------------------------------------------------------------------------------------------------------------------------------------------------------------------------------------------------------------------------------------------------------------------------------------------------------------------------------------------------------------------------------------------------------------------------------------------------------------------------------------------------------------------------------------------------------------------------------------------------------------------------------------------------------------------------------------------------------------------------------------------------------|
| Population characteristics | Participants in the discovery cohort (ZOE 2.0 study) were 300 children with mean age 4.5 yrs (52 months), 48% female, and of mixed race/ethnicity (i.e., 38% African-American, 33% Hispanics, and 30% non-Hispanic whites), selected as a 5% subset of the parent cohort of the ZOE 2.0 study, 1:1 case-control ratio for established person-level dental caries experience. Participants were sequenced in two batches. Two initially selected participants who did not produce microbiome sequencing or clinical data in the first batched were replaced in the second batch, to maintained a discovery sample size of 300. The replication sample comprised 116 preschool-age children from the same population (i.e., public preschools in North Carolina), who were of similar age (55 months), 54% were female, and also of mixed race/ethnicity (i.e., 45% African American, 40% Hispanics, and 16% non-Hispanic whites). Two participants out of an intial sample of 118 were excluded due to insufficient reads produced in MTG/MTX. |
| Recruitment                | Participants of both ZOE 2.0 (discovery sample) and ZOE pilot (replication sample) were a community-based sample of children attending public preschools (i.e., Head Start programs/centers) in North Carolina. All children in a state-wide sample of 3-5-year-olds attending public preschools were eligible for study participation, as long as they had a caregiver at least 18 years of age who understood the study documents and agreed to participate. A flowchart of eligibility and enrollment of the parent study is presented as Figure in the cohort profile publication with PMID: 33139633. Children in the replication sample were a convenience sample of children from the same population that contributed to studies supporting feasibility and fidelity of procedures and protocols developed for and employed in the parent study.                                                                                                                                                                                      |
| Ethics oversight           | Human observational data and analyses received approval (#14-1992) from the University of North Carolina-Chapel Hill Office of Human Research Ethics Institutional Review Board on September 18, 2014. Legal guardians of all children provided written informed consent for participation in the study. All research was performed in accordance with the Declaration of Helsinki.                                                                                                                                                                                                                                                                                                                                                                                                                                                                                                                                                                                                                                                           |

Note that full information on the approval of the study protocol must also be provided in the manuscript.

## Clinical data

Policy information about [clinical studies](#)

All manuscripts should comply with the ICMJE [guidelines for publication of clinical research](#) and a completed [CONSORT checklist](#) must be included with all submissions.

|                             |                                                                                                                                                                 |
|-----------------------------|-----------------------------------------------------------------------------------------------------------------------------------------------------------------|
| Clinical trial registration | This was an observational study and thus was not registered as a clinical trial.                                                                                |
| Study protocol              | Clinical data collection protocol reported in Ginnis et al. 2019, PMID: 30838597; biofilm collection protocol reported in Divaris et al., 2019, PMID: 30838598. |

## Data collection

Data collection for the discovery sample (ZOE 2.0 study) took place between 2016-2019 across the state of North Carolina and in participating public preschool centers (i.e., Head Start). The cohort profile manuscript including details of data collection is reported in Divaris et al. 2020 PMID: 33139633.

## Outcomes

Clinical endpoints measured in the ZOE studies were dental caries experience using modified ICDAS criteria for caries lesion detection. Recording of clinical measures of caries experience was done by 10 trained and calibrated clinical examiners at participating children's public preschool classroom. Caries experience in the ZOE 2.0 and the ZOE pilot studies was defined both at the local level (i.e., from the 5 surfaces where dental plaque biofilm was harvested from) and the person-level (i.e., considering all 88 tooth surfaces of a child's dentition). Details of the clinical endpoint definitions are provided in the study's clinical protocol Ginnis et al. 2019 PMID: 30838597 and a description of these endpoints in the entire cohort is provided in the cohort profile by Divaris et al. 2020 PMID: 33139633.
